# Supplementary material
Source: publisher figshare collection journal article supplement (https://acs.figshare.com/ndownloader/files/3921235)
Supplement: Supplementary file 1 [file 3921235]

## Supporting Information

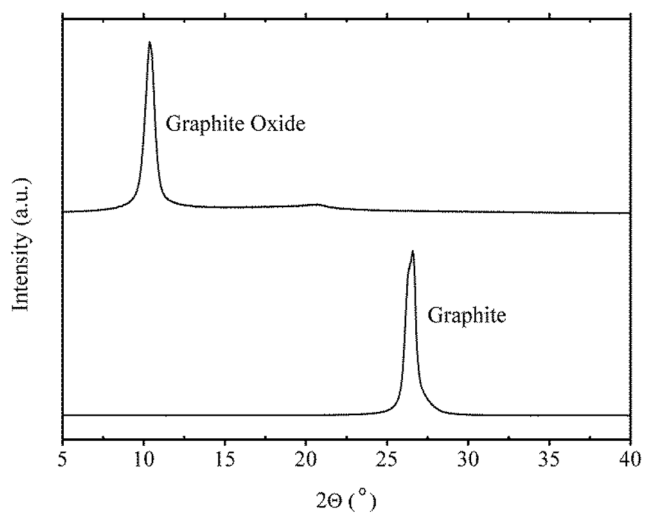

**Figure 1 SI.** X-ray diffraction patterns of graphite, and graphite oxide.

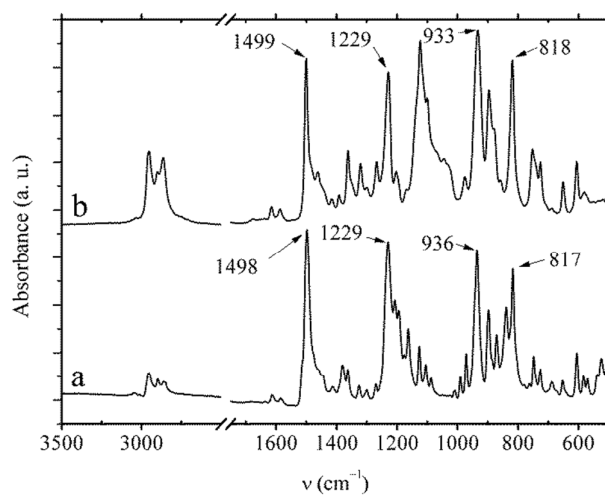

**Figure 2 SI.** FT-IR spectra of a) *t*BP-oda, and b) *t*BP-Jeff<sub>148</sub>

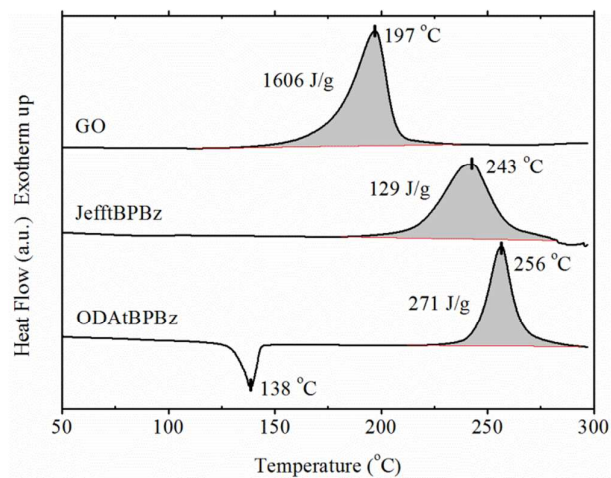

**Figure 3 SI.** DSC thermograms of *t*BP-oda, *t*BP-jeff<sub>148</sub>, and GO prior any treatment.

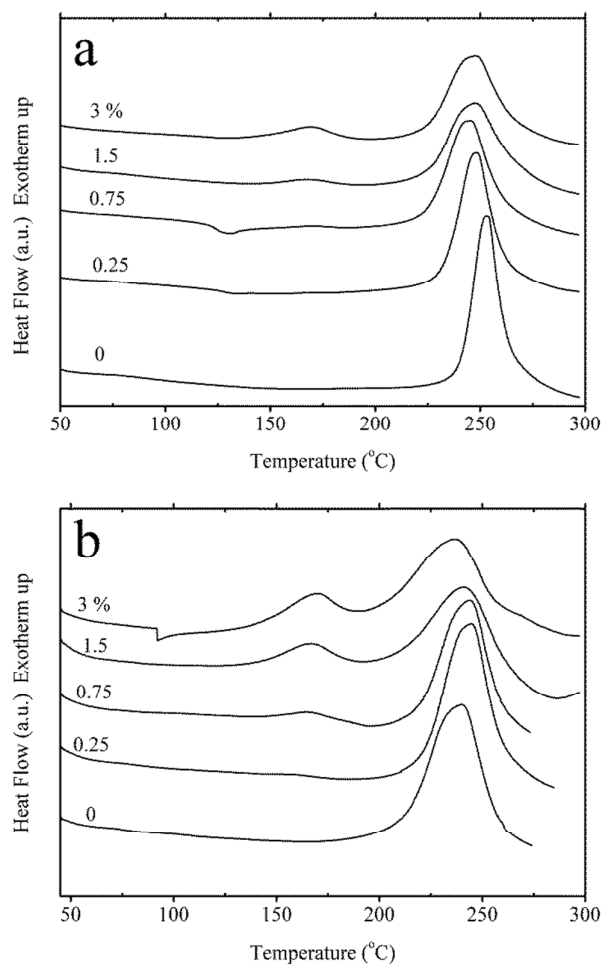

**Figure 4 SI.** DSC thermograms of the a) *t*BP-oda series and b) *t*BP-jeff<sub>148</sub> series.

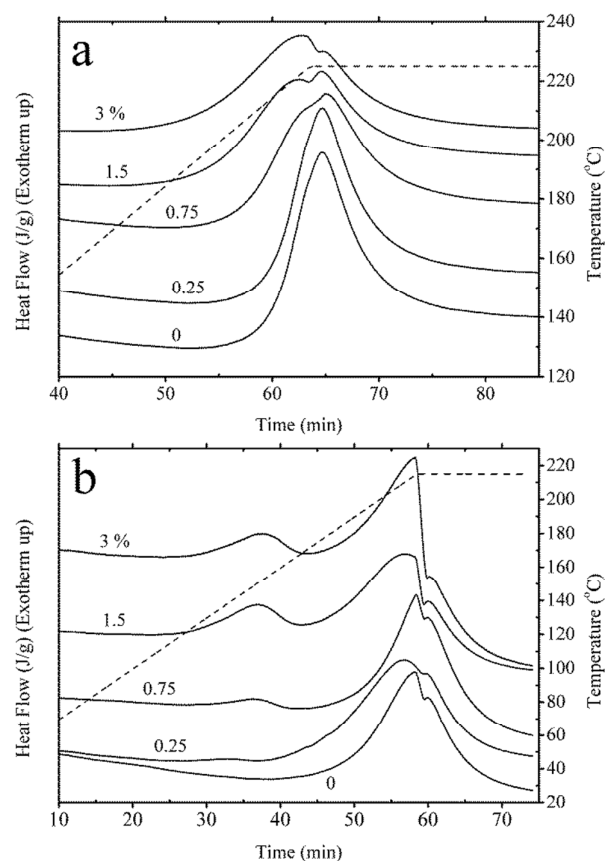

**Figure 5 SI.** DSC thermograms of the a) *t*BP-oda series and b) *t*BP-jeff<sub>148</sub> series. The *t*BP-oda series were subjected to an isothermal stage at 140 °C for 30 min, cooled to 130 °C, heated to 225 °C at a rate of 3 °C /min, and finally maintained at 225 °C for 25 min. Only the temperature ramp at 3 °C /min and the isothermal stage at 225 °C are shown. The *t*BP-jeff<sub>148</sub> series were heated from 40 to 215 °C at a rate of 3 °C/min, and maintained at 215 °C for 25 min.

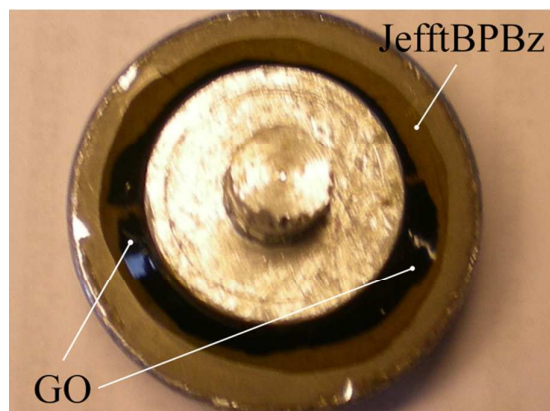

**Picture 1.** Cured *t*BP-jeff<sub>148</sub> containing 0.75 wt% GO after rheological experiments.
